# Supplementary material for: Sequential and co-occurring DNA damage response genetic mutations impact survival in stage III colorectal cancer patients receiving adjuvant oxaliplatin-based chemotherapy
Source: PubMed Central journal article supplement (PMC7923464; doi:10.1186/s12885-021-07926-1), 2021-03-02
Supplement: 12885_2021_7926_MOESM1_ESM.pdf [file 12885_2021_7926_MOESM1_ESM.pdf]

**Sequential and co-occurring DNA damage response genetic mutations impact survival in stage III colorectal cancer patients receiving adjuvant oxaliplatin-based chemotherapy**

Peng-Chan Lin<sup>1,2,3</sup>, Yu-Min Yeh<sup>1</sup>, Ren-Hao Chan<sup>4</sup>, Bo-Wen Lin<sup>4</sup>, Po-Chuan Chen<sup>4</sup>, Chien-Chang Pan<sup>2,3,7</sup>, Meng-Ru Shen<sup>5,6,7\*</sup>

<sup>1</sup>Department of Oncology, National Cheng Kung University Hospital, College of Medicine, National Cheng Kung University, Taiwan

<sup>2</sup>Department of Genomic Medicine, National Cheng Kung University Hospital, College of Medicine, National Cheng Kung University, Taiwan

<sup>3</sup>Department of Computer Science and Information Engineering, College of Electrical Engineering and Computer Science, National Cheng Kung University

<sup>4</sup>Department of Surgery, National Cheng Kung University Hospital, College of Medicine, National Cheng Kung University, Taiwan

<sup>5</sup>Graduate Institute of Clinical Medicine, National Cheng Kung University Hospital, College of Medicine, National Cheng Kung University, Taiwan

<sup>6</sup>Department of Obstetrics and Gynecology, National Cheng Kung University Hospital, College of Medicine, National Cheng Kung University, Taiwan

<sup>7</sup>Department of Pharmacology, National Cheng Kung University Hospital, College of Medicine, National Cheng Kung University, Taiwan

\*Correspondence to: Meng-Ru Shen, Department of Department of Obstetrics and Gynecology, National Cheng Kung University Hospital, College of Medicine, No.138, Sheng-Li Road, Tainan 704, Taiwan

Tel: +886-6-2353535 Ext 5505

a

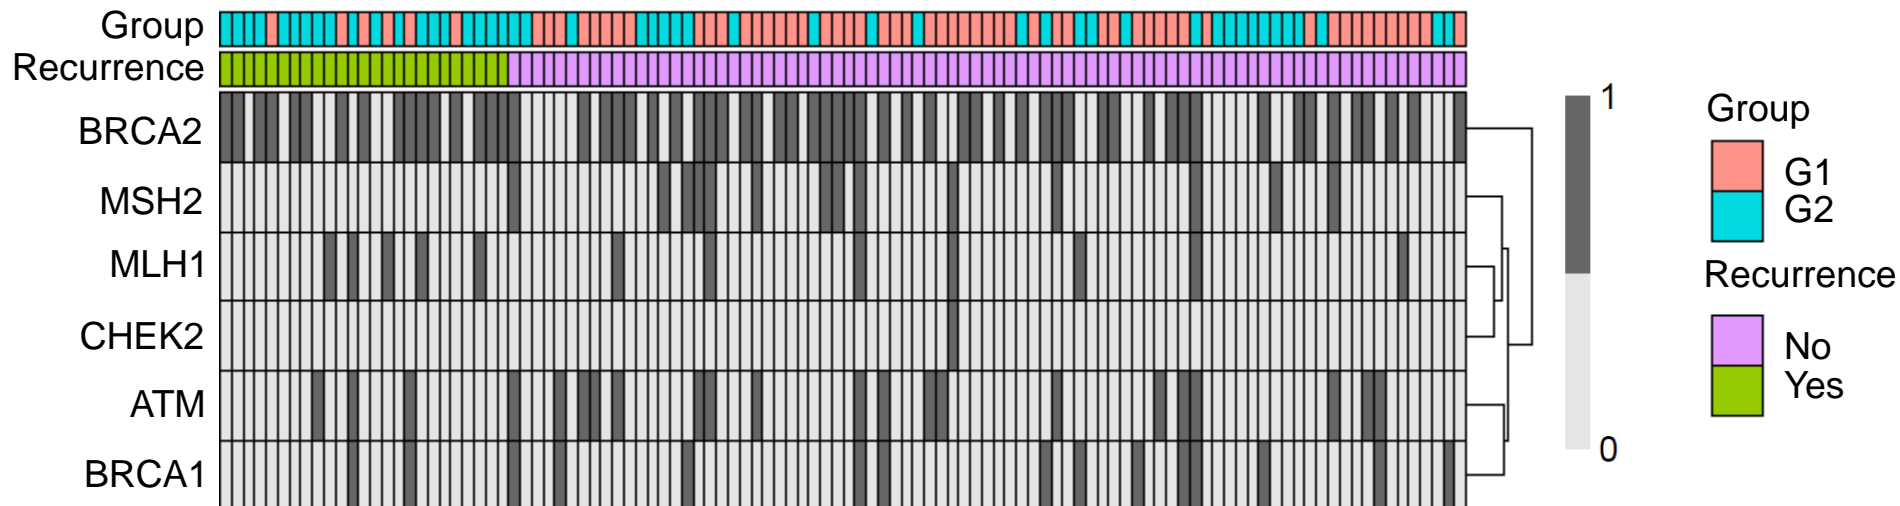

b

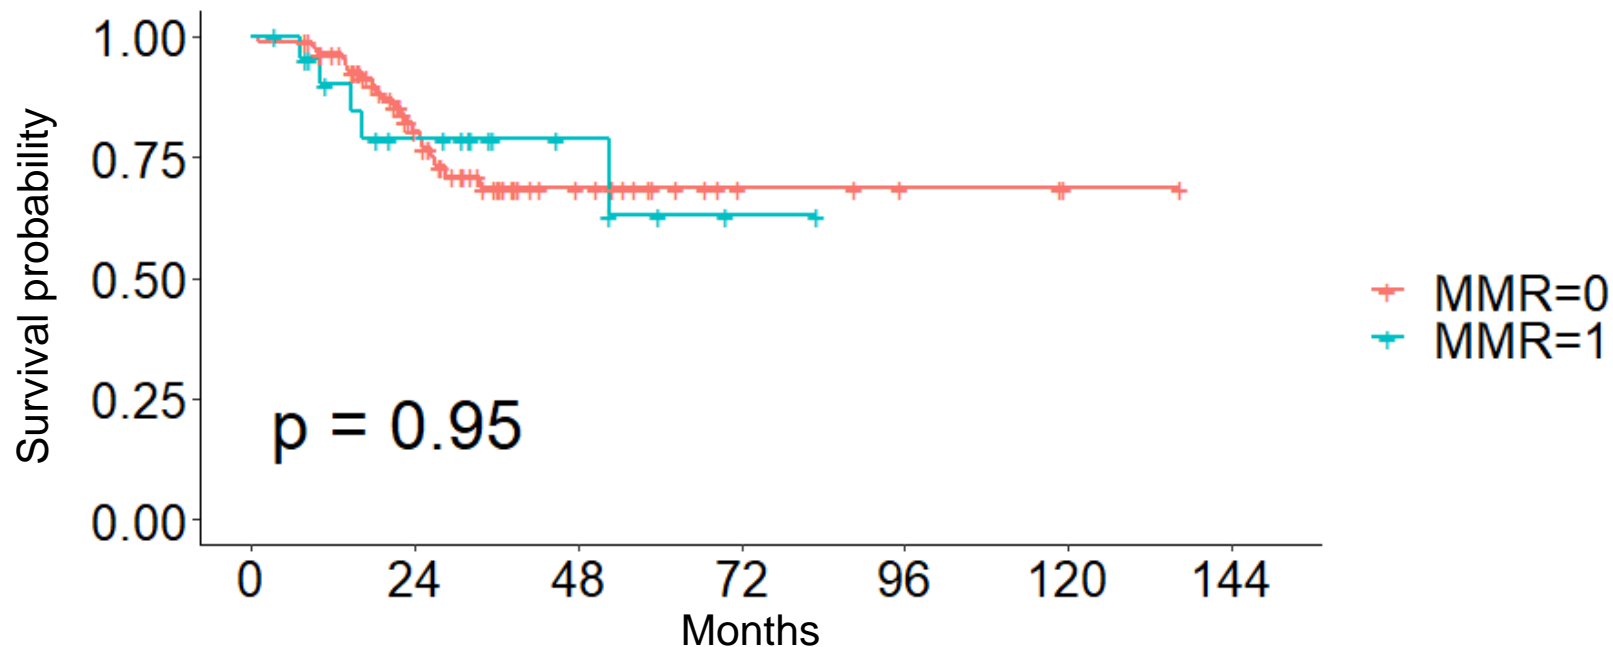

Supplementary Fig. S1 The association between mismatch repair and homologous recombination gene mutations. **a** Heatmap of CRC with MMR and homologous recombination genetic variants and clinical characteristics. **b** Kaplan-Meier plot of MMR mutations in CRC patients, with no significant difference.

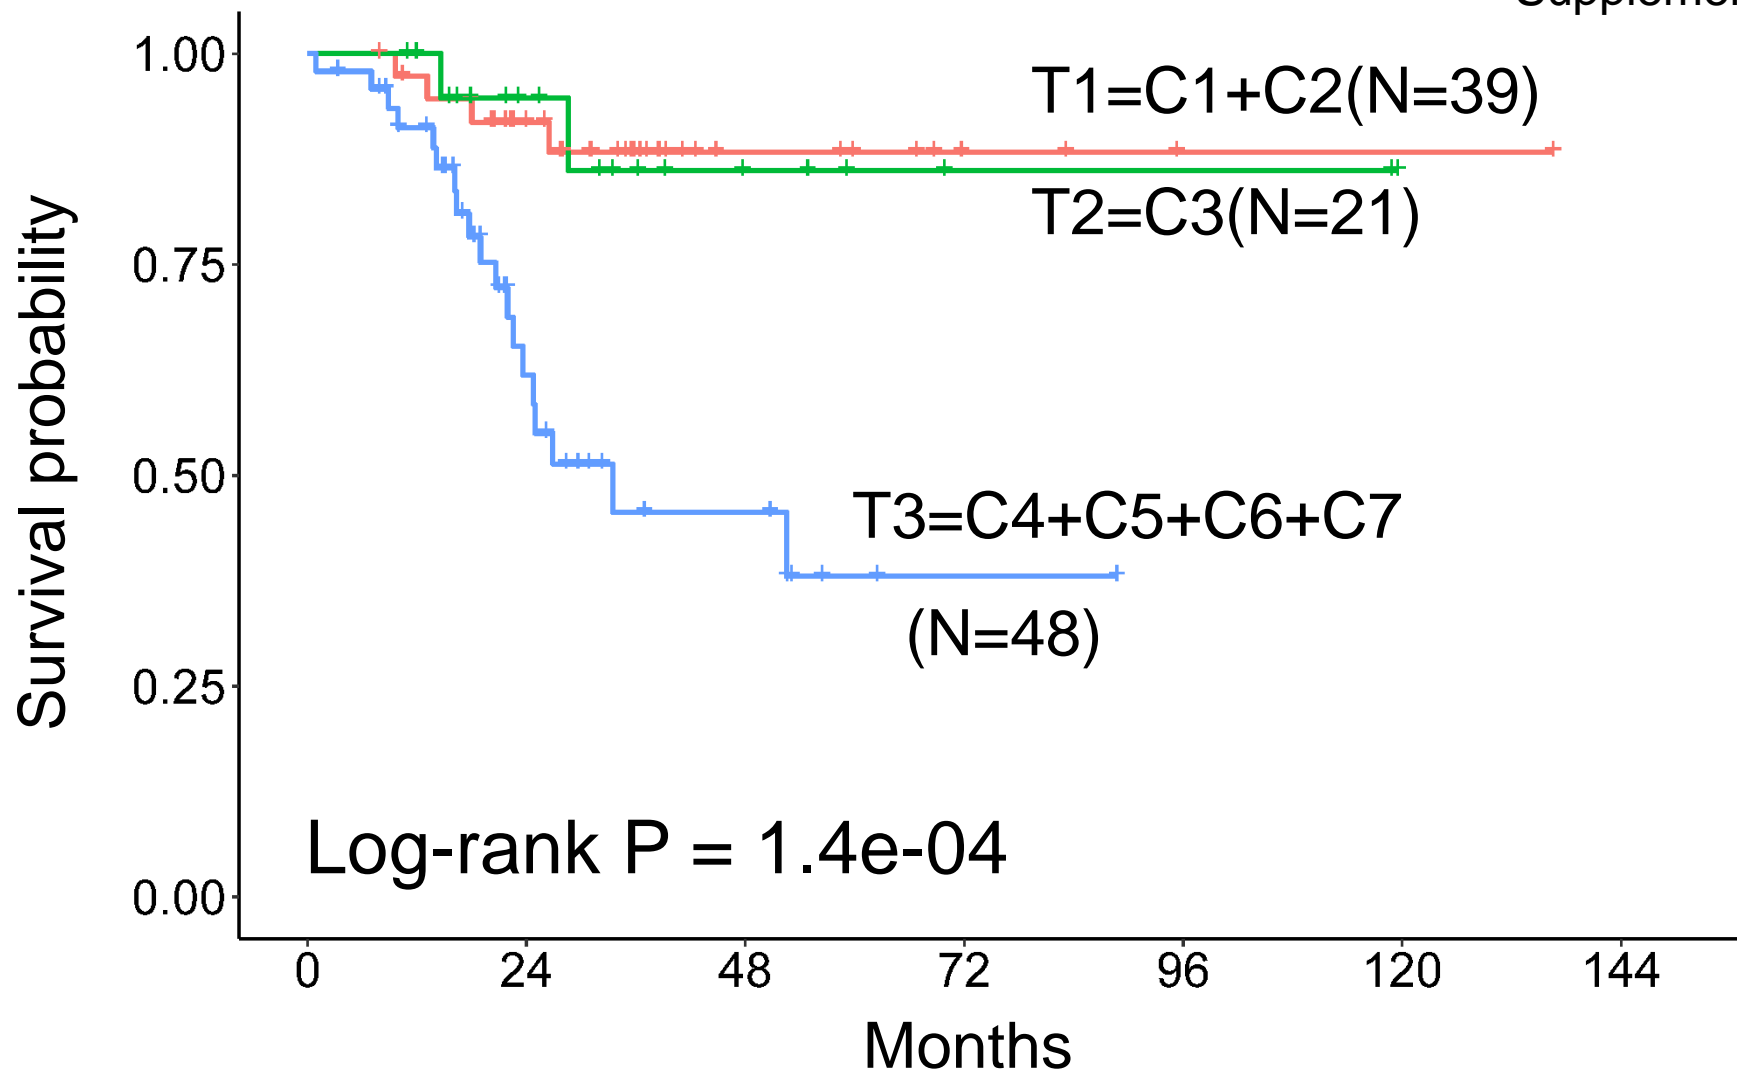

Supplementary Fig. S2 Kaplan-Meier plot of decision subgroups T1, T2 and T3. Patients in T1 (N = 39) and T2 (N=21) had longer recurrence-free survival than patients in T3 (N = 48). T1 vs T2 (HR = 1.05, 95% CI = 0.19–5.71, P = 1) T1 vs T3 (HR = 5.89, 95% CI = 1.99–17.4, P = 0.001) T2 vs T3 (HR = 5.75, 95% CI = 1.34–24.73, P = 0.02) (median recurrence-free survival, NA months [95% CI, NA-NA] vs 33.47 months [95% CI, 23.63-NA])

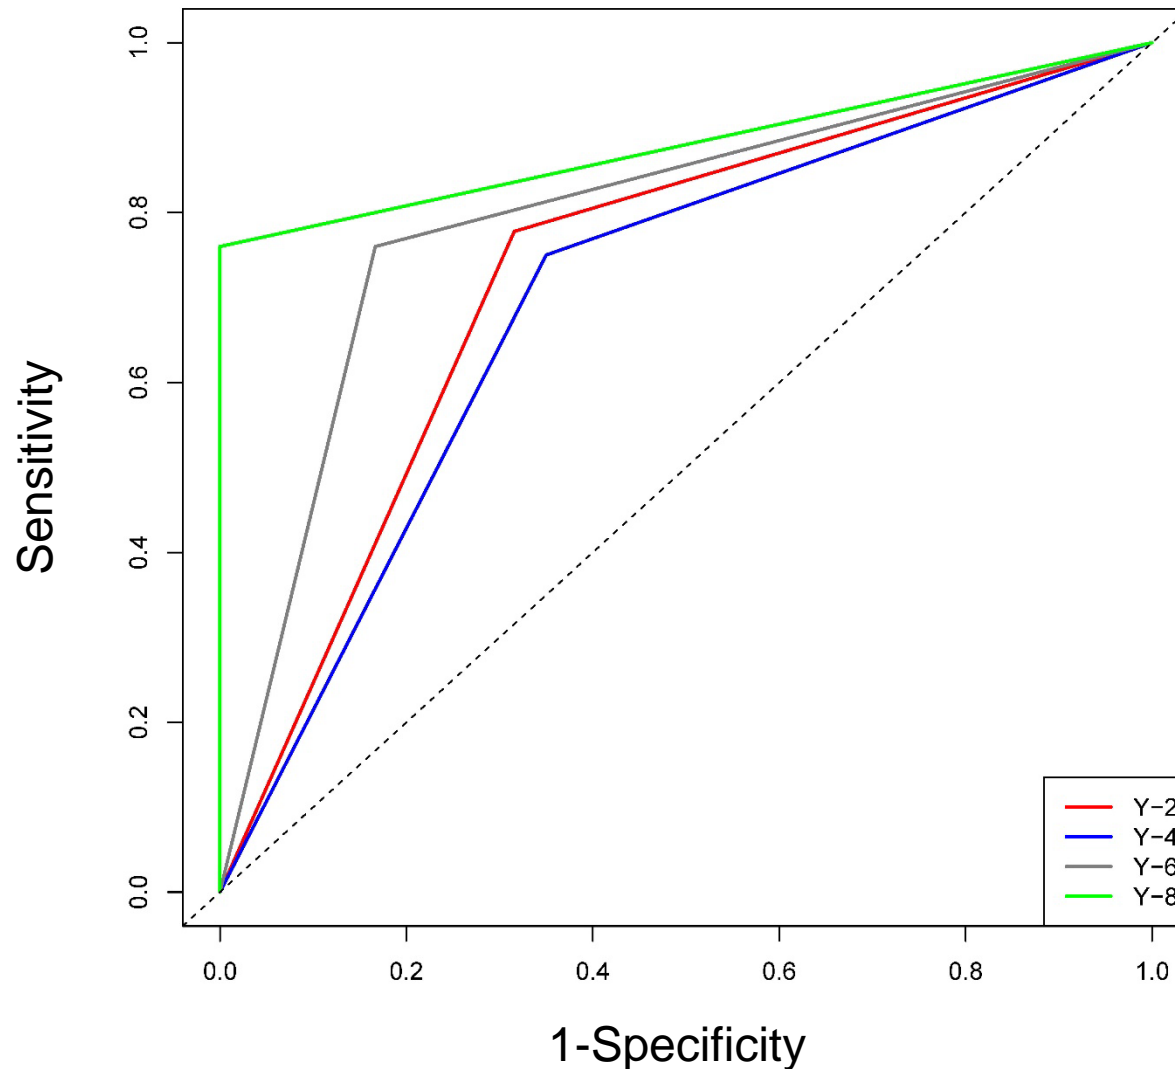

Supplementary Fig. S3 Time-dependent receiver operating characteristic (ROC) curves for 2, 5, 6, and 8 years before recurrence for the 2 groups assessed at follow-up visits. The area under the curve (AUC) of this model at 2, 4, 6, and 8 years in the training set was 0.73, 0.7, 0.797, and 0.88, respectively.

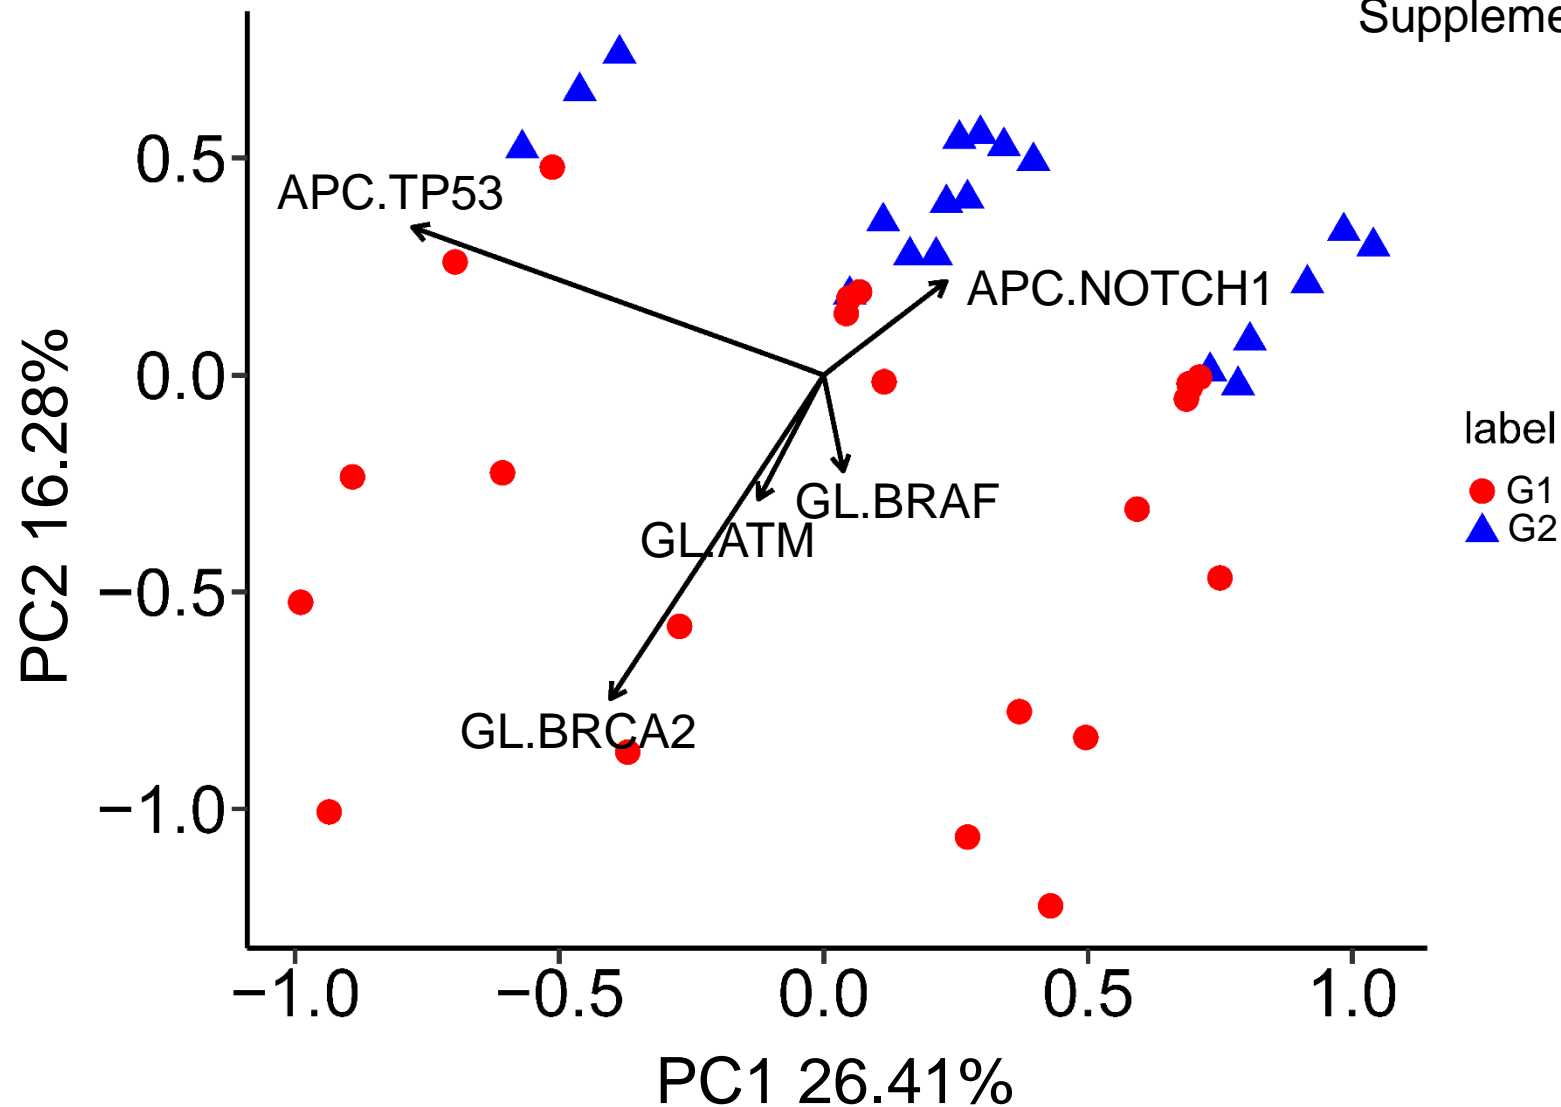

Supplementary Fig. S4 PCA plot of subgroups G1 and G2 by sequential genetic mutations. There was a significant difference between G1 and G2 subgroups. Sequential germline (GL) genetic mutations followed by BRCA2, ATM and BRAF somatic mutations tend to be important features in G1; APC, TP53 and APC, NOTCH1 somatic mutations belong to G2. Red circles represent the G1 group and blue triangles the G2 group.

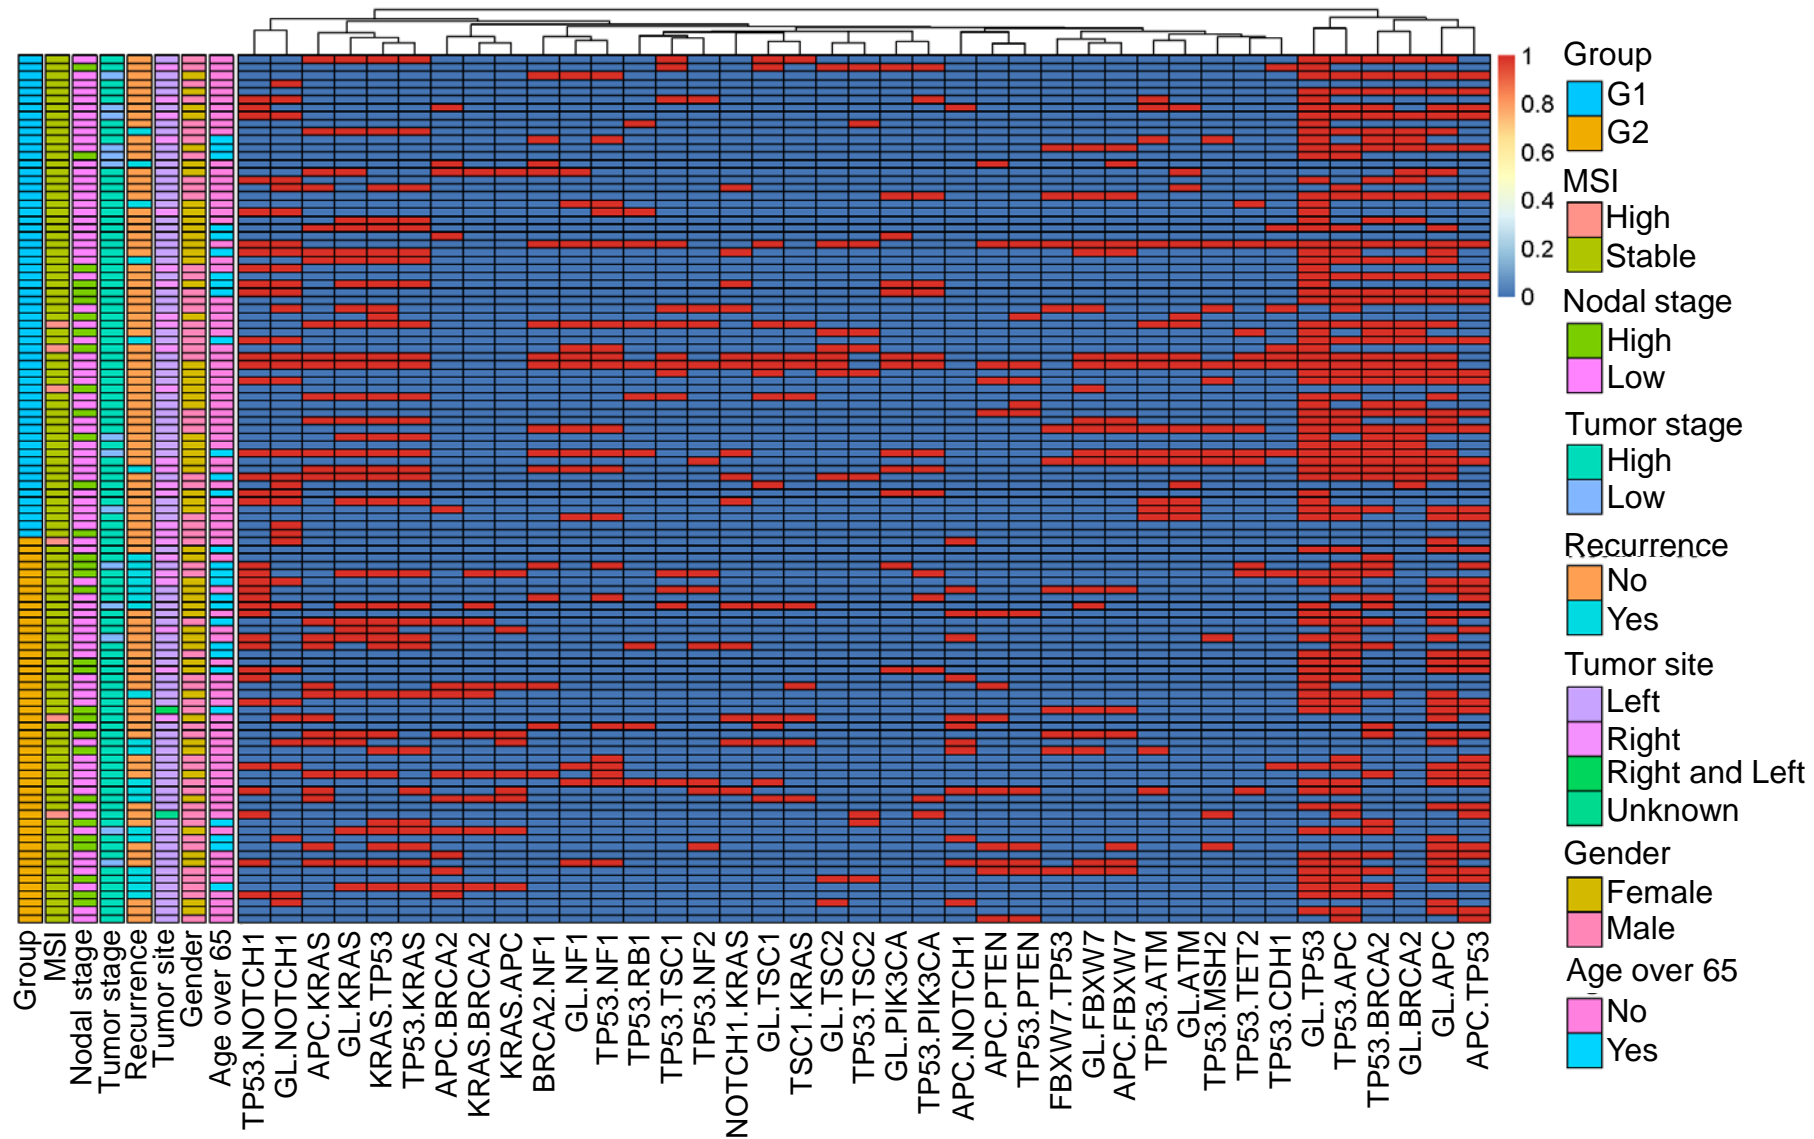

Supplementary Fig. S5 Heatmap of CRC sequential genetic mutations and clinical characteristics occurring in at least 10 patients.

a

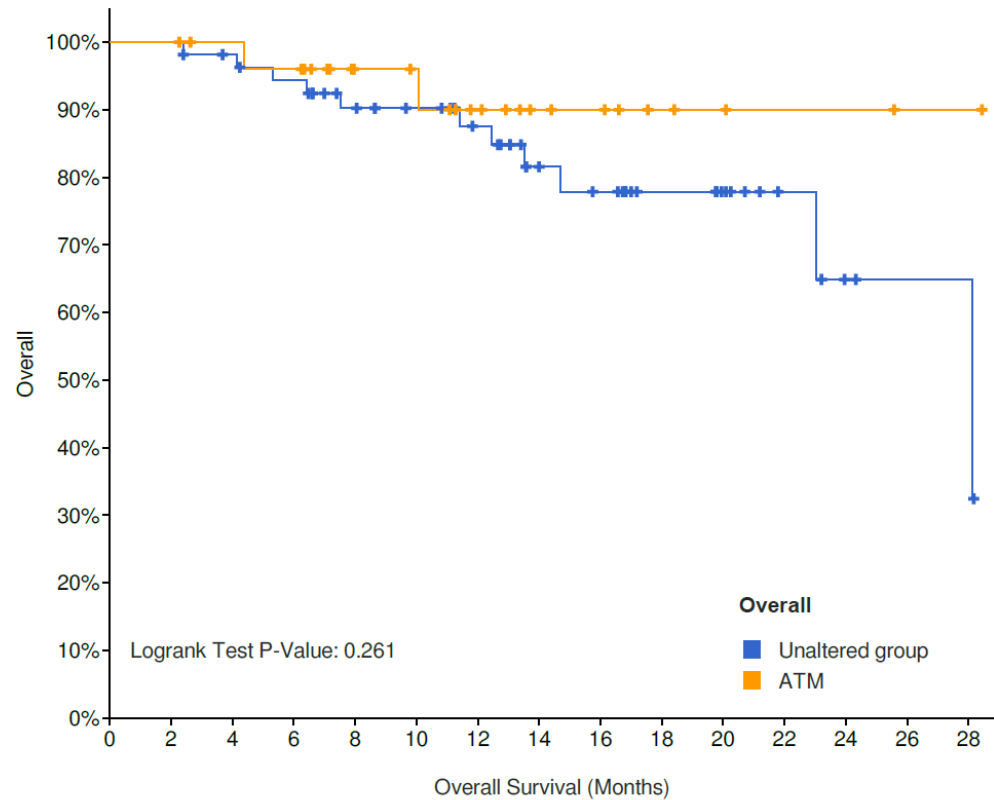

b

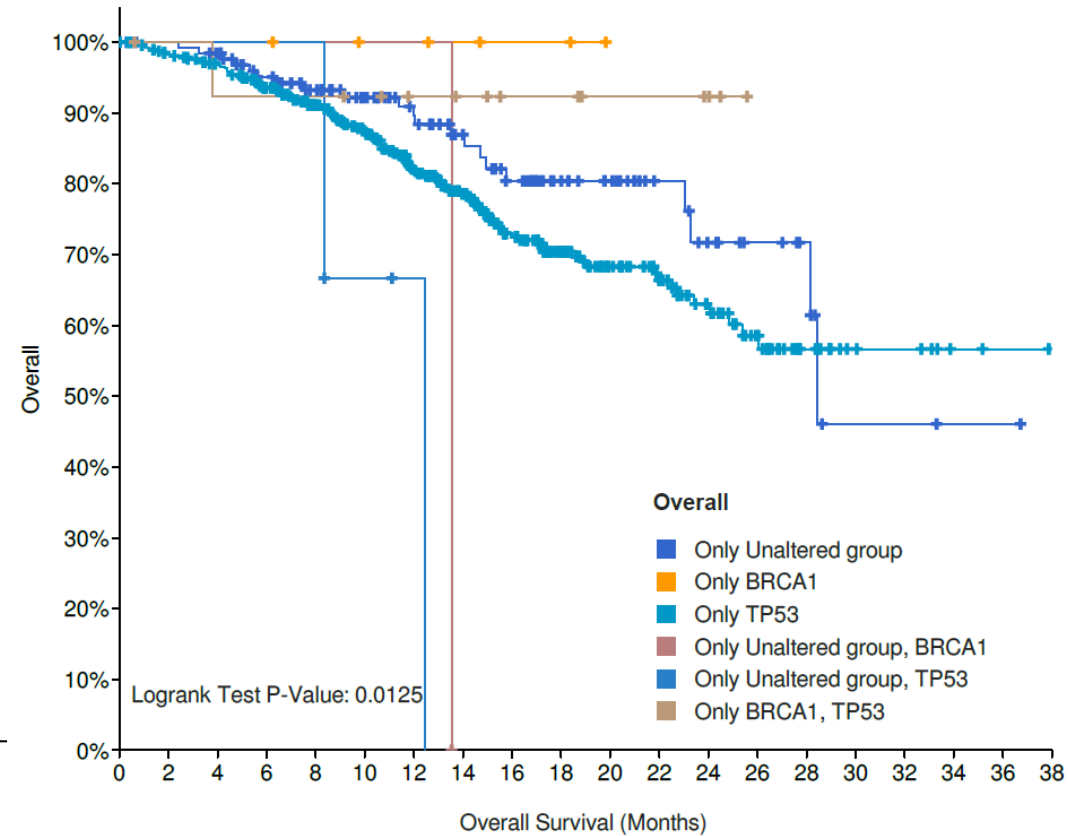

Supplementary Fig. S6. Kaplan-Meier plot of ATM and TP53 with BRCA1 mutations of CRC patients in cBioPortal. **a** CRC patients with ATM mutations tend to have better survival than patients with ATM mutations. **b** The occurrence of BRCA1 and TP53 somatic mutations led to a poorer prognosis than BRCA1 somatic mutations only in CRC patients.

Supplementary Table S1. Patients characteristics in low and high risk groups

| Characteristic              | All (N=108) | G1 (N=60) | G2 (N=48) | P value |
|-----------------------------|-------------|-----------|-----------|---------|
| Age                         |             |           |           | 0.28    |
| <65                         | 80(74%)     | 47(78.3%) | 33(68.8%) |         |
| >=65                        | 28(26%)     | 13(21.7%) | 15(31.2%) |         |
| Gender                      |             |           |           | 0.85    |
| Male                        | 54(50%)     | 31(51.7%) | 23(47.9%) |         |
| Female                      | 54(50%)     | 29(48.3%) | 25(52.1%) |         |
| Tumor site                  |             |           |           | 0.16    |
| Left                        | 82(75.9%)   | 43(78.3%) | 39(81.3%) |         |
| Right                       | 24(24.1%)   | 17(21.7%) | 7(18.7%)  |         |
| Tumor invasion <sup>a</sup> |             |           |           | 0.57    |
| T1/T2                       | 14(13%)     | 9(15%)    | 5(10.4%)  |         |
| T3/T4                       | 94(87%)     | 51(85%)   | 43(89.6%) |         |
| Lymph node <sup>a</sup>     |             |           |           | 0.2     |
| N0/N1                       | 77(71.3%)   | 46(76.7%) | 31(64.6%) |         |
| N2                          | 31(28.7%)   | 14(23.3%) | 17(35.4%) |         |
| Mismatch Repair Status      |             |           |           | 0.99    |
| Proficient                  | 102(94.4%)  | 57(95%)   | 45(93.8%) |         |
| Deficient                   | 6(5.6%)     | 3(5%)     | 3(6.2%)   |         |
| MMR genetic variants        |             |           |           | 0.99    |
| Mutation                    | 22(20.4%)   | 12(20%)   | 10(20.9%) |         |
| Wild Type                   | 86(79.6%)   | 48(80%)   | 38(79.1%) |         |



Abbreviations:

DNA mismatch repair: MMR; mismatch repair status proficient: microsatellite instability high or MMR protein loss by Immunohistochemistry (IHC) stain.

a. The American Joint Committee on Cancer Stage

**Supplementary Table S2. The association of MMR genes and HRD**

| A    | B     | Neither | A not B | B not A | Both | Odds Ratio | p-Value  | Tendency         |
|------|-------|---------|---------|---------|------|------------|----------|------------------|
| MLH1 | BRCA2 | 42      | 6       | 54      | 6    | 0.779612   | 0.762857 | Mutual-exclusive |
| MLH1 | ATM   | 79      | 7       | 17      | 5    | 3.272566   | 0.065713 | Co-occurrence    |
| MLH1 | BRCA1 | 85      | 8       | 11      | 4    | 3.796234   | 0.061547 | Co-occurrence    |
| MSH2 | BRCA2 | 44      | 4       | 50      | 10   | 2.1848     | 0.255471 | Co-occurrence    |
| MSH2 | ATM   | 80      | 6       | 14      | 8    | 7.41203    | 0.00121  | Co-occurrence    |
| MSH2 | BRCA1 | 83      | 10      | 11      | 4    | 2.977877   | 0.103713 | Co-occurrence    |

**Supplementary Table S3. ATM and BRCA2 mutations in subgroup C1 and C2**

| Chr   | Start    | End      | Ref | Alt | Func.refG | Gene.refG | ExonicFur  | AAChange | Transcript | Exon   |
|-------|----------|----------|-----|-----|-----------|-----------|------------|----------|------------|--------|
| chr11 | 1.08E+08 | 1.08E+08 | G   | A   | exonic    | ATM       | nonsynony  | ATM:NM   | NM_0000    | exon5  |
| chr11 | 1.08E+08 | 1.08E+08 | G   | A   | exonic    | ATM       | nonsynony  | ATM:NM   | NM_0000    | exon11 |
| chr11 | 1.08E+08 | 1.08E+08 | C   | T   | exonic    | ATM       | nonsynony  | ATM:NM   | NM_0000    | exon3  |
| chr11 | 1.08E+08 | 1.08E+08 | G   | T   | exonic    | ATM       | nonsynony  | ATM:NM   | NM_0000    | exon4  |
| chr11 | 1.08E+08 | 1.08E+08 | -   | T   | exonic    | ATM       | frameshift | ATM:NM   | NM_0000    | exon25 |
| chr11 | 1.08E+08 | 1.08E+08 | G   | A   | exonic    | ATM       | stopgain   | ATM:NM   | NM_0000    | exon25 |
| chr11 | 1.08E+08 | 1.08E+08 | G   | A   | exonic    | ATM       | nonsynony  | ATM:NM   | NM_0000    | exon26 |
| chr11 | 1.08E+08 | 1.08E+08 | C   | T   | exonic    | ATM       | stopgain   | ATM:NM   | NM_0000    | exon7  |
| chr11 | 1.08E+08 | 1.08E+08 | C   | T   | exonic    | ATM       | nonsynony  | ATM:NM   | NM_0000    | exon28 |
| chr11 | 1.08E+08 | 1.08E+08 | C   | T   | exonic    | ATM       | stopgain   | ATM:NM   | NM_0000    | exon30 |
| chr11 | 1.08E+08 | 1.08E+08 | G   | A   | exonic    | ATM       | nonsynony  | ATM:NM   | NM_0000    | exon23 |
| chr11 | 1.08E+08 | 1.08E+08 | C   | T   | exonic    | ATM       | nonsynony  | ATM:NM   | NM_0000    | exon52 |
| chr11 | 1.08E+08 | 1.08E+08 | G   | A   | exonic    | ATM       | nonsynony  | ATM:NM   | NM_0000    | exon15 |
| chr11 | 1.08E+08 | 1.08E+08 | C   | A   | exonic    | ATM       | nonsynony  | ATM:NM   | NM_0000    | exon2  |
| chr11 | 1.08E+08 | 1.08E+08 | A   | G   | exonic    | ATM       | nonsynony  | ATM:NM   | NM_0000    | exon40 |
| chr11 | 1.08E+08 | 1.08E+08 | C   | T   | exonic    | ATM       | nonsynony  | ATM:NM   | NM_0000    | exon8  |
| chr13 | 32915246 | 32915246 | T   | C   | exonic    | BRCA2     | nonsynony  | BRCA2:N  | NM_0000    | exon11 |
| chr13 | 32906609 | 32906609 | A   | T   | exonic    | BRCA2     | nonsynony  | BRCA2:N  | NM_0000    | exon10 |
| chr13 | 32914061 | 32914061 | G   | A   | exonic    | BRCA2     | nonsynony  | BRCA2:N  | NM_0000    | exon11 |
| chr13 | 32905084 | 32905084 | A   | C   | exonic    | BRCA2     | nonsynony  | BRCA2:N  | NM_0000    | exon9  |
| chr13 | 32907386 | 32907386 | -   | T   | exonic    | BRCA2     | frameshift | BRCA2:N  | NM_0000    | exon10 |
| chr13 | 32906873 | 32906873 | G   | A   | exonic    | BRCA2     | nonsynony  | BRCA2:N  | NM_0000    | exon10 |
| chr13 | 32972340 | 32972340 | A   | T   | exonic    | BRCA2     | nonsynony  | BRCA2:N  | NM_0000    | exon27 |
| chr13 | 32912073 | 32912073 | G   | T   | exonic    | BRCA2     | nonsynony  | BRCA2:N  | NM_0000    | exon11 |
| chr13 | 32913785 | 32913785 | A   | C   | exonic    | BRCA2     | nonsynony  | BRCA2:N  | NM_0000    | exon11 |

AAChange  
p.G138R  
p.R568K  
p.T39I  
p.K93N  
p.I1237fs  
p.W1221X  
p.M132I  
p.R248X  
p.P1382L  
p.Q1500X  
p.R1106K  
p.P2553L  
p.S759N  
p.H17N  
p.Q1982R  
p.R337C  
p.S2252P  
p.I332F  
p.E1857K  
p.D237A  
p.I591fs  
p.D420N  
p.L3230F  
p.G1194V  
p.K1765Q

Supplementary Table S4. Patients characteristics in there groups

| Characteristic         | C1~2 (N=39) | C3 (N=21) | C4~7 (N=48) | P value |
|------------------------|-------------|-----------|-------------|---------|
| Age                    |             |           |             | 0.35    |
| <65                    | 32(82.1%)   | 15(71.4%) | 33(68.8%)   |         |
| >=65                   | 7(17.9%)    | 6(28.6%)  | 15(31.2%)   |         |
| Gender                 |             |           |             | 0.88    |
| Male                   | 21(53.8%)   | 10(47.6%) | 23(47.9%)   |         |
| Female                 | 18(46.2%)   | 11(52.4%) | 25(52.1%)   |         |
| Tumor site             |             |           |             | 0.017   |
| Left                   | 32(82.1%)   | 11(52.4%) | 39(81.3%)   |         |
| Right                  | 7(17.9%)    | 10(48.6%) | 7(18.7%)    |         |
| Tumor stage            |             |           |             | 0.58    |
| T1/T2                  | 7(17.9%)    | 2(9.5%)   | 5(10.4%)    |         |
| T3/T4                  | 32(82.1%)   | 19(90.5%) | 43(89.6%)   |         |
| Nodal stage            |             |           |             | 0.17    |
| N0/N1                  | 32(82.1%)   | 14(66.7%) | 31(64.6%)   |         |
| N2                     | 7(17.9%)    | 7(33.3%)  | 17(35.4%)   |         |
| Mismatch Repair Status |             |           |             | 0.41    |
| Proficient             | 38(97.4%)   | 19(90.5%) | 45(93.8%)   |         |
| Deficient              | 1(2.6%)     | 2(9.5%)   | 3(6.2%)     |         |
